# Supplementary material for: Genome-wide DNA hypomethylation and RNA:DNA hybrid accumulation in Aicardi–Goutières syndrome
Source: eLife. 2015 Jul 16;4:e08007. doi: 10.7554/eLife.08007 (PMC4528086; doi:10.7554/eLife.08007)
Supplement: Supplementary file 1. — Genotype and high-throughput sequencing information for DRIP-seq, MethylC-seq, and RNA-seq. DOI: http://dx.doi.org/10.7554/eLife.08007.014 [file elife08007s001.xlsx]

## Sheet: Sheet1
Supplementary File 1
Experiment	Name	Cell type	Gender	Mutation	Genotype	Platform	Read type	Raw reads	Mapped reads*	CpG Coverage	C to T conversion rate (%)
DRIP-seq	Control 1 (NT control)	Primary fibroblast	Female	-	-	Illumina HiSeq	SR100	22745045	17788127	-	-
DRIP-seq	Control 3 (NHDF)	Primary fibroblast	Female	-	-	Illumina HiSeq	SR50	33315194	29225031	-	-
DRIP-seq	AGS1 P1	Primary fibroblast	Male	TREX1	R114H + c.600_601insGAT	Illumina HiSeq	SR100	32371224	20426854	-	-
DRIP-seq	AGS1 P2	Primary fibroblast	Male	TREX1	c.58dupG het + c.240dupA het	Illumina HiSeq	SR100	44352986	30684815	-	-
DRIP-seq	AGS2 P1	Primary fibroblast	Male	RNASEH2B	A177T hom	Illumina HiSeq	SR50	67246784	16344727	-	-
DRIP-seq	AGS2 P2	Primary fibroblast	Female	RNASEH2B	A177T + G146S	Illumina HiSeq	SR100	16681941	12310379	-	-
DRIP-seq	AGS4 P1	Primary fibroblast	Female	RNASEH2A	R236Q + R25R	Illumina HiSeq	SR50	50634846	12752540	-	-
DRIP-seq	AGS4 P2	Primary fibroblast	Female	RNASEH2A	R25R hom	Illumina HiSeq	SR100	31855883	21152950	-	-
DRIP-seq	AGS5 P1	Primary fibroblast	Male	SAMHD1	Deletion Ex12-16 hom	Illumina HiSeq	SR100	51143204	28746295	-	-
DRIP-seq	AGS5 P2	Primary fibroblast	Female	SAMHD1	c.1609-1G>C hom	Illumina HiSeq	SR100	28020798	19815428	-	-
MethylC-seq	Control 1 (NT control)	Primary fibroblast	Female	-	-	Illumina HiSeq	SR100	181233878	74781815	3.35	99.8
MethylC-seq	Control 2 (M10Y)	Primary fibroblast	Male	-	-	Illumina HiSeq	SR100	321443576	181153254	7.82	99.6
MethylC-seq	AGS1 P1	Primary fibroblast	Male	TREX1	R114H + c.600_601insGAT	Illumina HiSeq	SR100	162050528	42596861	3	99.5
MethylC-seq	AGS2 P1	Primary fibroblast	Male	RNASEH2B	A177T hom	Illumina HiSeq	SR100	203695464	95449511	3.74	99.8
MethylC-seq	AGS4 P1	Primary fibroblast	Female	RNASEH2A	R236Q + R25R	Illumina HiSeq	SR100	198822169	117755533	4.6	99.9
MethylC-seq	AGS5 P1	Primary fibroblast	Male	SAMHD1	Deletion Ex12-16 hom	Illumina HiSeq	SR100	179000959	50454595	3.21	99.4
RRBS	GM12697	Lymphoblastoid cell line	-	-	-	Illumina HiSeq	SR50	42162167	20584888	-	99.4
RRBS	AGS2 LCL	Lymphoblastoid cell line	-	RNASEH2B	NA	Illumina HiSeq	SR50	22371312	10561761	-	99.8
RNA-seq	Control 1 (NT control) rep 1	Primary fibroblast	Female	-	-	Illumina HiSeq	SR100	72912385	64918204	-	-
RNA-seq	Control 1 (NT control) rep 2	Primary fibroblast	Female	-	-	Illumina HiSeq	SR100	30549217	28929138	-	-
RNA-seq	AGS1 P1 rep 1	Primary fibroblast	Male	TREX1	R114H + c.600_601insGAT	Illumina HiSeq	SR100	75791169	68312689	-	-
RNA-seq	AGS1 P1 rep 2	Primary fibroblast	Male	TREX1	R114H + c.600_601insGAT	Illumina HiSeq	SR100	35985197	30594478	-	-
RNA-seq	AGS2 P1 rep 1	Primary fibroblast	Male	RNASEH2B	A177T hom	Illumina HiSeq	SR100	63777897	54932665	-	-
RNA-seq	AGS2 P1 rep 2	Primary fibroblast	Male	RNASEH2B	A177T hom	Illumina HiSeq	SR100	38444586	31573606
RNA-seq	AGS2 P2 rep 1	Primary fibroblast	Female	RNASEH2B	A177T + G146S	Illumina HiSeq	SR100	71513039	64224823	-	-
RNA-seq	AGS2 P2 rep 2	Primary fibroblast	Female	RNASEH2B	A177T + G146S	Illumina HiSeq	SR100	33085046	31020129	-	-
RNA-seq	AGS4 P1 rep 1	Primary fibroblast	Female	RNASEH2A	R236Q + R25R	Illumina HiSeq	SR100	57772529	53126065	-	-
RNA-seq	AGS4 P1 rep 2	Primary fibroblast	Female	RNASEH2A	R236Q + R25R	Illumina HiSeq	SR100	30590623	26730335
RNA-seq	AGS4 P2 rep 1	Primary fibroblast	Female	RNASEH2A	R25R hom	Illumina HiSeq	SR100	79384494	71304791	-	-
RNA-seq	AGS4 P2 rep 2	Primary fibroblast	Female	RNASEH2A	R25R hom	Illumina HiSeq	SR100	29275887	27421037	-	-
RNA-seq	AGS5 P1 rep 1	Primary fibroblast	Male	SAMHD1	Deletion Ex12-16 hom	Illumina HiSeq	SR100	74672979	66982647	-	-
RNA-seq	AGS5 P1 rep 2	Primary fibroblast	Male	SAMHD1	Deletion Ex12-16 hom	Illumina HiSeq	SR100	42281169	34186942	-	-
* Duplicate reads were retained for MethylC-seq and RNA-seq while unique reads were used for DRIP-seq
