# Supplementary material for: Genome-wide DNA hypomethylation and RNA:DNA hybrid accumulation in Aicardi–Goutières syndrome
Source: eLife. 2015 Jul 16;4:e08007. doi: 10.7554/eLife.08007 (PMC4528086; doi:10.7554/eLife.08007)
Supplement: Supplementary file 2. — Significantly up- and down-regulated genes in Aicardi–Goutières syndrome fibroblasts and their gene ontology analysis. DOI: http://dx.doi.org/10.7554/eLife.08007.015 [file elife08007s002.xlsx]

## Sheet: Up genes
Supplementary Table 2
Up regulated genes
green cells (p adjusted < 0.1)
Y-linked genes are not shown.
	AGS1 P1		AGS2 P1		AGS2 P2		AGS4 P1		AGS4 P2		AGS5 P1
Gene	log 2 fold change	p adjusted	log 2 fold change	p adjusted	log 2 fold change	p adjusted	log 2 fold change	p adjusted	log 2 fold change	p adjusted	log 2 fold change	p adjusted
LXN	9.10277	0.0292473	9.75921	0.00243633	8.69967	0.102747	8.89407	0.00613755	9.29036	0.00636564	10.6602	0.000503818
GSTM1	9.36305	0.000612361	9.2459	0.00071267	0.762803	1	7.54457	0.00517794	7.37946	0.00720197	8.43528	0.00402928
GSTT1	7.65245	0.00482563	9.19776	0.000317885	8.25379	0.0113651	9.31996	0.000200339	9.062	0.000704303	-Inf	1
PSG4	7.48713	0.00673189	8.68012	0.000410419	8.17901	0.00896923	5.83598	0.0298043	6.36583	0.0205277	0.114829	1
ADD2	7.21036	0.028921	7.19724	0.0108588	5.29498	0.746795	8.25117	0.00119203	7.93685	0.00346588	5.40723	0.101082
CDH18	1.2304	1	5.59199	0.164066	6.69855	0.244609	8.64306	0.0022231	8.69802	0.00251157	7.64188	0.0428107
KRT14	0.186758	1	6.54152	0.0211514	3.04474	1	7.47665	0.00288628	4.30561	0.619767	6.90394	0.00584518
TGM2	4.30525	1	5.83778	0.0826598	0.662876	1	4.46033	0.263101	8.18542	0.00251157	6.45695	0.0141503
PSPHP1	Inf	0.00673189	NA	NA	NA	NA	Inf	0.0598816	Inf	0.0283551	Inf	1
GAL	4.70612	1	6.34106	0.195905	2.29421	1	7.41223	0.0124295	2.93327	1	7.42003	0.00841367
CXCL6	-0.774741	1	7.90543	0.00266773	0.68245	1	4.18572	0.53431	0.881873	1	6.56619	0.01264
IL1B	Inf	1	Inf	0.000744092	Inf	1	Inf	0.0161736	Inf	0.472191	Inf	1
ID1	2.3565	1	4.83659	0.208086	2.68458	1	5.11456	0.0796238	3.86512	0.967427	5.53886	0.0648514
BST2	3.85555	1	6.26177	0.00891194	-0.0587617	1	-1.49808	1	-2.53993	1	5.10959	0.0869576
FCRLA	4.85337	1	5.69396	0.166034	2.82766	1	6.61089	0.0230789	5.25349	0.615215	6.24112	0.0648514
RSAD2	-0.66666	1	6.4166	0.00614069	0.91193	1	0.162483	1	-3.21292	1	5.12318	0.0635017
OASL	0.571904	1	7.51514	0.00161416	0.549242	1	1.43244	1	-1.37097	1	6.12265	0.0179566
SKA1	4.30485	1	5.94893	0.0819286	1.63959	1	6.23524	0.0248763	0.86266	1	3.58675	0.666918
IGF2BP1	3.07385	1	4.61753	0.283619	3.44713	1	5.89641	0.0355882	5.50581	0.0781624	3.41832	0.83775
CXCL5	3.63543	1	9.3656	0.00136656	2.34001	1	5.26616	0.265064	4.17097	1	9.85012	0.000191837
PI16	-3.49015	1	4.03007	0.56088	3.00424	1	4.78905	0.183203	6.51267	0.0173055	7.03401	0.00595193
VAT1L	5.06059	1	5.74141	0.195905	3.54751	1	7.14796	0.0120145	6.51664	0.0286169	0.486204	1
HCLS1	-0.757452	1	4.60638	0.128167	2.69884	1	5.86819	0.0229595	7.03529	0.0144528	4.58671	0.274969
CGB5	Inf	1	Inf	0.0279754	NA	NA	Inf	0.0143256	Inf	1	Inf	1
NPIPB15	7.15856	0.130703	6.05499	0.293143	7.92683	0.147325	6.81238	0.0704953	7.32489	0.0516595	-1.00353	1
HNRNPA1P33	Inf	1	Inf	0.0494508	Inf	1	Inf	0.00612761	Inf	1	Inf	0.101082
SLC35F1	7.35147	0.00964959	-0.820491	1	8.42434	0.0113651	1.88089	1	-0.337558	1	-1.46721	1
H3F3AP4	5.77002	0.909176	6.71148	0.0807456	0.935742	1	5.38862	0.220736	1.73977	1	7.25048	0.0495891
MTRNR2L1	5.32948	0.965538	5.76082	0.0837677	-0.14107	1	6.29148	0.0269743	3.48715	1	5.45439	0.244771
APBA2	1.04091	1	4.3927	0.48098	1.4998	1	5.83072	0.095369	4.5436	0.959931	2.39808	1
PTPRN	4.41291	1	4.68337	0.899804	0.799158	1	8.48365	0.00277661	3.79521	1	3.05391	1
HMMR	4.35819	1	5.73197	0.0964772	1.50818	1	5.08323	0.129105	0.73899	1	2.57476	1
BIRC5	3.21199	1	3.91685	0.438923	0.969476	1	5.18281	0.0389168	0.686825	1	1.99847	1
CDC45	2.42355	1	3.96234	0.487233	1.63711	1	4.94906	0.0968693	0.758354	1	4.11764	0.221754
CENPM	2.08444	1	4.16861	0.381566	1.64198	1	5.43821	0.0336935	1.25481	1	2.27579	1
MYBL2	1.78193	1	3.90154	0.473996	1.46645	1	5.26798	0.0359791	0.631076	1	3.03828	1
RASIP1	3.51285	1	4.84233	0.136671	2.78843	1	5.56705	0.035031	3.71061	0.901566	4.97421	0.129786
GDF10	-1.01861	1	1.0756	1	3.27011	1	2.54084	0.655956	5.52204	0.11192	4.79936	0.0804618
MMP12	4.46968	1	3.68377	0.865139	2.64607	1	1.81388	1	0.186227	1	5.39005	0.0369682
PRG4	0.324157	1	1.47513	1	0.533401	1	-0.334659	1	1.67135	1	5.06179	0.0996726
CDC20	2.37423	1	4.15528	0.343447	1.06718	1	5.38047	0.0310603	0.284018	1	1.62386	1
PARD6B	5.33223	1	6.3739	0.0807456	0.654701	1	5.13495	0.195126	-1.23013	1	6.03048	0.149195
IFI6	-1.44288	1	4.15417	0.0971839	-0.288104	1	1.13072	1	-0.834604	1	1.02555	1
FGL2	-2.30179	1	0.71702	1	2.74078	1	2.47726	1	4.48751	0.619767	6.88053	0.00446498
FAM64A	2.53258	1	4.20736	0.385005	1.09301	1	4.54078	0.0976816	0.779877	1	1.5109	1
H19	-5.68404	0.675857	5.34011	0.0607366	4.1302	1	2.43334	0.992977	4.24144	0.713491	5.32198	0.205687
GINS2	3.61984	1	4.32074	0.400648	2.04617	1	5.40341	0.0421543	1.1667	1	4.07327	0.327682
IL33	-1.52017	1	-0.935006	1	-0.0452666	1	-3.52167	1	1.00276	1	9.57794	0.000146722
IFI44L	0.486782	1	5.07556	0.038685	-0.767436	1	1.25661	1	-0.762575	1	3.68269	0.327682
MALL	2.22326	1	4.15487	0.603505	-0.0604732	1	5.31401	0.113845	1.62264	1	5.54186	0.0311659
COL8A1	4.62585	0.457604	3.77452	0.345407	3.62339	1	2.87286	0.740609	4.15469	0.360523	5.81054	0.094071
SPC24	0.376386	1	2.49581	1	0.75431	1	4.7313	0.0540368	0.597737	1	1.30896	1
KCNF1	Inf	1	Inf	1	NA	NA	NA	NA	Inf	1	Inf	0.0549788
CXCL3	0.700248	1	7.34056	0.00775547	1.5645	1	4.2732	0.324778	1.81679	1	4.40741	0.381612
CXCL1	0.216234	1	7.44919	0.00680491	-0.405924	1	4.8739	0.25787	-0.205187	1	3.99623	0.422867
HHIP	0.24348	1	5.203	0.239777	-1.25281	1	3.32036	0.807968	2.60897	1	8.24209	0.000418527
PTTG1	2.37303	1	3.60728	0.562746	0.273794	1	4.61064	0.0774416	-0.446086	1	1.25431	1
FABP5	1.76475	1	4.01154	0.375192	1.199	1	5.47641	0.0308268	1.30841	1	2.94851	0.934936
NOS3	3.44271	1	4.03078	1	4.2014	1	8.48656	0.0298043	6.93639	0.454485	4.72433	1
SKA3	4.16683	1	5.18543	0.178486	0.992441	1	5.2634	0.0759735	0.532194	1	3.29244	0.605313
MMP10	2.59224	1	3.24016	1	2.77027	1	4.38401	0.340665	2.60236	1	5.07287	0.0662108
KIAA0101	4.36958	1	5.01067	0.232646	2.14364	1	5.67085	0.0300485	1.69719	1	4.09571	0.393405
ELFN2	2.80981	1	4.03305	0.979786	3.21759	1	5.65999	0.168428	2.92865	1	5.69307	0.094071
C15orf48	2.79584	1	8.01985	0.0238981	1.89072	1	3.82263	0.967065	2.96122	1	4.77783	0.8642
TK1	2.0756	1	3.94594	0.333636	1.64735	1	6.00208	0.00912272	1.25942	1	2.41422	1
IL8	-1.44577	1	8.05915	0.00227359	-0.91607	1	4.57159	0.249743	0.308195	1	4.11669	0.33528
TM4SF1	0.50959	1	3.37118	1	-0.402351	1	5.05582	0.165523	2.78619	1	7.16116	0.00274139
TRH	-Inf	1	3.46575	0.705484	-0.0947791	1	0.410971	1	9.274	0.00173079	3.91946	0.31944
KRT19	4.34903	1	4.47443	0.315659	0.827482	1	8.5198	0.000626023	5.62628	0.187731	5.08519	0.114166
CCL11	-1.92503	1	5.69514	0.0211514	0.410872	1	2.1736	0.865644	0.163627	1	-1.51975	1
EXO1	3.97688	1	5.4458	0.184178	2.48251	1	5.45165	0.0811832	1.3723	1	4.97035	0.101082
UBE2C	2.7599	1	4.08362	0.413542	1.1594	1	5.25778	0.0421741	0.269191	1	1.94052	1
DES	1.45012	1	4.25403	0.751443	1.42493	1	6.1466	0.0226794	-0.103578	1	0.443676	1
THBD	2.67969	1	3.47772	1	1.22993	1	3.74616	0.604841	2.83367	1	5.62356	0.0283955
AURKB	2.34894	1	4.1797	0.369331	1.28985	1	5.16008	0.0545814	0.507424	1	1.7642	1
SHISA2	6.13444	1	5.2862	0.507644	0.749832	1	7.34472	0.0506498	4.73586	1	5.9247	0.337836
PLCXD3	-Inf	1	-0.04993	1	1.07371	1	-0.290561	1	0.0672391	1	5.46205	0.0705563
GPAT2	1.95963	1	3.56356	0.356	3.6938	1	5.29787	0.0355882	2.3925	1	3.93006	0.290804
KRT16	-3.6312	1	2.7944	1	0.528528	1	3.06388	1	2.49625	1	6.72056	0.0296042
ISG15	0.322935	1	4.639	0.0688663	0.430423	1	3.5329	0.22382	0.936657	1	2.55547	1
DNER	5.40358	1	4.35362	1	2.88192	1	7.24016	0.0630563	4.04685	1	2.92911	1
RELN	0.634995	1	6.22855	0.163506	2.25424	1	4.38783	0.608759	-0.0931672	1	7.79712	0.00921817
HRCT1	2.25195	1	2.27754	1	1.57885	1	5.07234	0.053023	3.83224	0.650756	2.58903	1
MT1F	0.212412	1	7.79916	0.00615463	-1.97463	1	4.72783	0.253183	0.0786092	1	2.04029	1
ZNF280B	3.07296	1	5.65844	0.218606	3.29668	1	6.13324	0.0906537	4.91161	0.29747	5.90474	0.157746
PPP1R14C	-1.05305	1	1.1797	1	0.265193	1	1.67324	1	1.37413	1	5.88807	0.0367463
PAX9	2.94787	1	3.30985	1	5.44396	1	5.27547	0.350988	3.73746	1	6.24559	0.0869576
LINC01139	0.250642	1	0.59017	1	-0.479312	1	-0.0496504	1	5.21671	0.16127	6.33779	0.0946683
TENM3	1.68212	1	4.74823	0.354763	1.02769	1	5.95217	0.0661045	5.2131	0.165389	3.18052	1
AL132709.5	2.53817	1	3.15349	0.970029	0.627332	1	4.69764	0.0743182	0.806497	1	1.84834	1
RP5-1172A22.1	2.57956	1	3.14905	1	0.0662253	1	5.36335	0.0564075	2.97796	1	2.38951	1
RPL23AP32	-0.231702	1	4.41193	0.501364	-Inf	1	8.01543	0.0093249	1.0402	1	-Inf	1
HHIP-AS1	1.78757	1	2.88008	1	0.700202	1	3.39527	0.92939	4.0396	1	6.45796	0.0662108
HMGN1P14	NA	NA	NA	NA	NA	NA	Inf	0.0362862	NA	NA	Inf	1
RP11-180C1.1	Inf	1	Inf	0.333636	Inf	1	Inf	0.186313	Inf	1	Inf	0.030356
RP11-49C24.1	1.83841	1	4.79905	0.149451	1.19409	1	5.80481	0.0305193	1.79025	1	0.638371	1
RP11-214O1.3	4.10167	1	2.83887	1	-0.0947791	1	6.99593	0.0359791	1.43673	1	2.15559	1
FENDRR	Inf	0.679237	Inf	0.132843	Inf	1	Inf	0.0359791	Inf	1	Inf	1

## Sheet: Down genes
Down regulated genes
green cells (p adjusted < 0.1)
Y-linked genes are not shown.
	AGS1 P1		AGS2 P1		AGS2 P2		AGS4 P1		AGS4 P2		AGS5 P1
Gene	log 2 fold change	p adjusted	log 2 fold change	p adjusted	log 2 fold change	p adjusted	log 2 fold change	p adjusted	log 2 fold change	p adjusted	log 2 fold change	p adjusted
STEAP4	-10.4931	0.000403073	-7.91055	0.00253126	-0.117763	1	-9.81007	0.000141401	-10.3823	0.000292806	-6.80246	0.007344
NLGN4X	-Inf	0.0150815	-Inf	0.00614069	-3.12579	1	-6.19552	0.0795771	-9.73589	0.0140851	-9.64316	0.0180333
A2M	-7.38451	0.028921	-9.2212	0.000317885	-1.48527	1	-9.80786	0.000320272	-7.23964	0.00413277	-5.91401	0.0699059
CTB-167B5.2	-Inf	0.0192371	-Inf	0.00706668	-0.419323	1	-Inf	0.00739361	-Inf	0.00720197	-Inf	0.00888927
SRD5A2	-4.93322	1	-Inf	1.45794e-05	-2.47797	1	-Inf	1.55348e-05	-10.6378	0.000288667	-8.42991	0.00784068
IGFBP2	-8.05507	0.0200128	-5.85399	0.0837677	-3.20774	1	-8.69693	0.000474039	-7.29912	0.00612919	-3.95248	1
RERG	-6.80876	0.775296	-Inf	0.00644785	-7.36299	0.147325	-Inf	0.00561383	-7.29527	0.0556373	-7.4442	0.0472818
LAPTM5	-4.47633	1	-6.87764	0.00873128	-5.4008	0.78127	-6.97888	0.0151697	-6.56	0.0207836	-5.86217	0.0662108
RANBP3L	-6.80304	0.181392	-10.6499	8.0054e-05	-4.21516	1	-Inf	1.55348e-05	-6.7996	0.0271821	-9.18742	0.000950999
CLEC1B	-4.38081	1	-Inf	0.00243633	-2.8864	1	-Inf	0.00242907	-8.24778	0.0124765	-10.0906	0.00841367
TM4SF20	-3.74338	1	-9.38179	0.000754363	-3.02123	1	-Inf	0.000328043	-6.50599	0.0533353	-5.97787	0.0682953
CLEC12A	-3.76321	1	-Inf	1.45794e-05	-2.82208	1	-Inf	1.55348e-05	-10.7003	0.000288667	-6.70703	0.00921817
CLEC2A	-2.4221	1	-8.19114	0.00254712	-2.33101	1	-Inf	1.55348e-05	-13.0181	0.000288667	-6.00876	0.0529271
AC091814.2	-3.85411	1	-Inf	0.0211514	-3.15063	1	-Inf	0.0166266	-Inf	0.0205277	-Inf	0.0283955
RP11-325P15.1	-Inf	0.11868	-Inf	0.039257	-Inf	0.123779	-Inf	0.0308268	-Inf	0.0308983	-Inf	0.0444319
AC091814.3	-2.70883	1	-Inf	0.00232693	-2.8281	1	-Inf	0.00232681	-8.68545	0.00636564	-6.98259	0.0444319
AQP1	-5.68531	0.904327	-8.61615	0.000810874	-3.14466	1	-9.47449	0.000141401	-8.17642	0.00338287	-7.17508	0.0354562
RP11-366M4.3	-2.39211	1	-5.88609	0.0826598	-2.86057	1	-8.03616	0.00959951	-8.75626	0.00636564	-7.89513	0.0233084
RFPL4B	-7.18722	0.22528	-Inf	0.000181004	-2.1314	1	-Inf	0.000141401	-7.6671	0.0144528	-10.26	0.0024435
CLEC12B	-4.44727	1	-Inf	0.000585739	-3.21568	1	-Inf	0.000476951	-9.50531	0.00251157	-5.67258	0.0699059
CNTN1	-3.65724	1	-7.52854	0.00381458	-2.16904	1	-8.53024	0.00240011	-8.83531	0.00267463	-2.98441	1
CAPN6	-5.06387	1	-Inf	0.00244078	-4.2217	1	-5.70791	0.0663565	-6.26983	0.0728303	-6.53574	0.218685
COL4A4	-4.84306	0.549541	-4.84979	0.0637931	-1.14131	1	-5.31101	0.0457129	-5.6525	0.0618172	-4.07223	0.350817
SLCO4A1	-7.95798	0.355924	-6.78786	0.0660859	-1.97851	1	-Inf	0.00959951	-7.09463	0.0646421	-4.33031	1
NPTX2	-4.47077	1	-6.33414	0.039448	-0.48201	1	-8.31277	0.0022231	-11.8531	0.000738414	-5.16705	0.327682
SFRP4	-2.11998	1	-8.68324	0.00227075	0.0465997	1	-Inf	0.000769769	-7.09939	0.0140851	0.715315	1
SMOC2	-4.64521	1	-Inf	6.25042e-05	0.583252	1	-11.0617	0.000141401	-9.00962	0.00205163	-2.28161	1
MTUS1	-2.58706	1	-6.17954	0.0530967	-1.04628	1	-6.31274	0.0158245	-6.94465	0.0144528	-0.580562	1
PAX3	-1.2145	1	-5.94763	0.0818141	-1.0175	1	-10.3266	0.000404265	-Inf	0.000288667	-3.00993	1
SDK1	-4.76293	0.613962	-3.97642	0.634918	0.853556	1	-7.3719	0.0104453	-10.1753	0.00339686	-10.0826	0.00435608
TSHR	-1.82465	1	-5.51577	0.0865761	-1.6743	1	-Inf	0.00167374	-6.78426	0.0283551	-2.94291	1
GRIN3A	-5.17267	0.936398	-6.3227	0.0211514	-3.11235	1	-5.46347	0.0421511	-6.23078	0.0646421	-4.61755	0.340153
SAMD5	-3.7206	1	-5.0993	0.238196	-1.79552	1	-6.74706	0.0120145	-9.18926	0.00401077	-7.15171	0.0184613
C10orf105	-2.34042	1	-3.2069	1	-2.04908	1	-7.16532	0.0269743	-8.47039	0.0112311	-8.38422	0.0134874
XIST	-10.4275	0.000210446	-8.20873	0.000317885	-0.277111	1	0.0238266	1	0.455626	1	-9.94713	0.000267282
AC010980.2	-3.29061	1	-Inf	0.0800492	-1.88302	1	-Inf	0.0545814	-Inf	0.0685279	-8.5333	0.160705
SEPP1	-2.53644	1	-5.21564	0.0665384	0.372999	1	-6.82316	0.0022231	-6.58131	0.0145024	-3.23205	1
RP11-384O8.1	-4.19045	1	-Inf	0.0619643	-2.07245	1	-Inf	0.041905	-Inf	0.0580027	-8.7327	0.14492
TMEM176A	-2.65391	1	-0.855877	1	1.29611	1	-Inf	0.00840886	-7.53162	0.016125	-1.85712	1
MYOC	-7.96361	0.679237	-Inf	0.0534944	-5.19976	1	-Inf	0.0359791	-4.76943	0.733309	-6.9209	0.345868
PREX2	-2.48615	1	-5.29301	0.173234	-1.39912	1	-8.5338	0.00167374	-7.25427	0.00720197	-4.88578	0.171272
FGFR2	-0.476747	1	-4.25621	0.185377	-2.45285	1	-5.66452	0.0560726	-6.76176	0.0475369	-2.5547	0.99564
EPDR1	-1.951	1	-5.11105	0.142324	-1.24925	1	-10.381	6.48473e-05	-7.88268	0.00251157	-2.91765	1
RSPO4	-2.76785	1	-4.48172	0.238196	-0.453262	1	-Inf	0.0194326	-8.60876	0.0302669	0.560254	1
AQP9	-2.23457	1	-4.02936	0.552486	-0.507589	1	-Inf	0.00047946	-7.18071	0.0138523	-4.87045	0.130575
STEAP1B	0.0705485	1	-1.1823	1	-0.31149	1	-6.47059	0.0158245	-5.51898	0.0646526	-1.48334	1
MEOX2	-1.80999	1	-3.1533	0.671144	-0.430978	1	-9.29128	0.000340083	-6.47862	0.0261577	-1.22009	1
TMEM176B	-1.90763	1	0.251945	1	1.0725	1	-6.0714	0.03827	-10.0972	0.00339686	-2.1875	1
ALDH3A1	-2.5923	1	-4.0613	0.749917	-0.794467	1	-Inf	0.00561383	-8.10977	0.013519	-6.22078	0.147867
MYH1	-4.17409	1	-6.03132	0.0964772	-6.67813	0.102747	-6.81536	0.0153079	-2.83583	1	-4.84417	0.149195
KIAA1244	-0.185137	1	-4.10727	0.333636	-1.46273	1	-5.3565	0.0485741	-8.15454	0.00413277	-2.47659	1
THBS4	-1.41601	1	-4.90633	0.194325	-1.41077	1	-7.29004	0.00167374	-7.69837	0.00536674	-2.62339	1
PLEKHG1	-2.04659	1	-4.77022	0.0971839	0.130129	1	-7.08195	0.0060607	-4.03459	0.642451	-4.43441	0.284265
ITIH5	-0.19893	1	-1.65662	1	1.14325	1	-8.7747	0.000237019	-10.346	0.000288667	-2.12449	1
TMEM35	-2.68951	1	-8.0015	0.00863552	1.59488	1	-6.0032	0.0666423	-2.79335	1	-2.83435	1
TRPC6	-2.41134	1	-5.81904	0.0234122	1.1213	1	-10.0367	0.000474039	-2.74826	1	-3.38352	1
CLCA2	-4.12267	1	-5.98271	0.0856355	1.31859	1	-6.7779	0.0194326	-2.72949	1	-2.78416	1
CPNE8	-3.22747	1	-1.47872	1	-0.8257	1	-5.71068	0.0298043	-5.42487	0.0646421	-0.33085	1
LGR5	-2.45302	1	-3.34613	0.595874	-3.49062	1	-9.22483	0.000237019	-5.84374	0.0324117	0.140362	1
ST8SIA2	-1.55312	1	-2.36546	1	-1.64522	1	-7.13875	0.00982644	-Inf	0.00295283	-3.71404	0.917201
SLC47A1	-1.86646	1	-3.55052	0.787151	-1.21824	1	-8.8061	0.0022231	-7.18653	0.0122801	-4.60428	0.486337
CYP39A1	-2.20274	1	-Inf	0.0481942	-0.956415	1	-Inf	0.0375345	-5.99791	0.454485	-5.38166	0.346035
PRSS35	-6.41163	0.675857	-6.39373	0.0530967	-3.39918	1	-7.67578	0.00713148	-4.7289	0.517493	-5.46582	0.325587
AKAP6	-2.45931	1	-3.0941	0.729503	-2.12714	1	-5.03976	0.0434735	-5.27819	0.131678	-5.54492	0.0699059
TMEM132D	-6.11958	0.509422	-0.802595	1	-4.81724	1	-6.97151	0.0474729	-Inf	0.00898896	-2.33655	1
APCDD1	-1.32051	1	-0.412796	1	1.69456	1	-5.6443	0.0334295	-6.76381	0.0205277	-1.54244	1
GNA14	-5.61573	0.775296	-3.77365	0.96544	-1.1192	1	-6.93125	0.00843009	-4.49857	0.326727	-6.42125	0.0682953
CLSTN2	-0.907659	1	-Inf	0.0587128	-0.465945	1	-5.98824	0.192412	-Inf	0.0371243	-1.12244	1
IRX6	-2.04792	1	-4.71923	0.646904	-1.80535	1	-Inf	0.0260714	-Inf	0.0283551	-4.58705	0.492348
ZSWIM5	-5.39836	0.777935	-4.98491	0.281423	-1.19765	1	-Inf	0.00373855	-6.90134	0.0716386	-3.43554	1
INHBB	-3.26195	1	-6.79845	0.00644785	-0.192244	1	-8.13164	0.00201423	-5.06837	0.213998	-5.27438	0.177665
GRIK2	-2.45082	1	-4.15758	0.244247	-1.78974	1	-7.03607	0.00765132	-6.63726	0.0361256	-1.18927	1
NYAP1	-4.90433	1	-Inf	0.00227359	-0.954635	1	-4.33997	0.388285	-4.86505	0.426336	-7.78762	0.0473432
FAM84B	-0.837444	1	-Inf	0.00266773	-1.76943	1	-6.89507	0.0269743	-6.01758	0.109116	-2.8187	1
EMB	-0.0852394	1	-5.05383	0.176647	-1.06705	1	-7.64049	0.0389168	-8.85894	0.0302669	-4.99805	0.390234
GPR37	-0.652663	1	-5.55465	0.108848	-1.21108	1	-Inf	0.00824499	-9.35977	0.0205277	-3.84292	0.876043
DRD1	-2.66236	1	-Inf	0.00253126	-5.1649	1	-Inf	0.00246687	-5.25964	0.438709	-3.24198	1
SLC24A3	-0.686703	1	-Inf	0.0694205	0.0344702	1	-6.23963	0.132714	-Inf	0.0534871	-5.30443	0.723628
SERPINA5	-7.22101	0.713752	-6.53158	0.195905	-3.98865	1	-7.37452	0.052065	-8.09463	0.0426944	-7.50023	0.160705
PRELP	-5.0071	1	-5.45954	0.0814765	-1.97933	1	-8.28526	0.000463801	-3.99995	0.533341	-3.74646	1
MAOA	-1.83585	1	-4.94683	0.276745	-1.41203	1	-Inf	0.00153893	-8.33572	0.00557841	-5.48508	0.106599
ADH1B	-2.83173	1	-3.87487	0.572571	1.04173	1	-9.05577	0.000200339	-6.0031	0.0667498	-2.82331	0.659967
DAPK1	-0.880566	1	-4.91712	0.208086	-0.662594	1	-8.05018	0.00102067	-7.05495	0.00750772	-1.91355	1
VIT	-0.445021	1	-2.6767	1	-2.19578	1	-5.47379	0.0260714	-8.88893	0.0010008	-2.16843	1
C3orf72	-1.08671	1	-2.41811	1	-0.305899	1	-5.43351	0.0637748	-7.18394	0.00750772	-1.27677	1
CTD-2328D6.1	-1.54941	1	-7.0633	0.00452974	-0.0923037	1	-6.5273	0.0093249	0.159837	1	-1.31111	1
NBPF13P	-4.43028	1	-7.06831	0.0211514	-4.3702	1	-5.84084	0.057848	-3.71857	1	-4.46107	0.36274
LOXL4	-2.14345	1	-Inf	0.000950468	-2.24552	1	-7.19796	0.00739361	-2.78558	1	-3.54856	1
FRRS1L	-4.28146	1	-Inf	0.00152697	-0.920393	1	-8.27704	0.00705509	-3.27044	1	-3.10591	1
ENPP4	-2.07695	1	-1.98834	1	-0.302127	1	-5.67727	0.0218598	-3.68663	0.809802	-1.99628	1
CYP26B1	-2.51318	1	-4.9283	0.232459	0.223257	1	-7.24145	0.00336712	-5.05482	0.116683	-3.66209	1
PDK4	-2.39952	1	-1.86259	1	-0.206007	1	-Inf	0.0226794	-1.94006	1	-2.5369	1
BZRAP1	-1.99881	1	-2.15571	1	-2.13052	1	-1.68691	1	-0.639865	1	-9.15855	0.00586532
NTN1	-1.27941	1	-1.54985	1	0.761871	1	-6.00673	0.0223933	-4.58289	0.294093	-2.51325	1
PHKA1	-2.38601	1	-3.77114	0.673085	-1.52247	1	-5.43908	0.0476937	-3.34676	1	-3.42381	1
SDK2	-0.41367	1	-1.33583	1	0.804765	1	-1.98096	1	-6.77273	0.094583	-2.34166	1
ITGA8	-1.33247	1	-2.46024	1	-2.58442	1	-5.97808	0.0162461	-3.08721	1	0.0759019	1
HOXA9	-0.0813417	1	-0.312726	1	-0.357619	1	-0.666335	1	-0.159505	1	-Inf	0.000463181
BRINP1	-1.26261	1	-0.14472	1	0.831935	1	-6.36418	0.0160094	-3.91211	0.448485	-2.28367	1
SERTAD4	-1.42006	1	-3.09897	1	-2.95548	1	-7.71324	0.00230551	-2.24233	1	-2.23084	1
ARHGAP28	-0.863429	1	-3.14603	0.874486	-0.439426	1	-6.33078	0.00840886	-2.18792	1	-0.932893	1
P2RX6	-2.21423	1	-2.88228	1	-1.56583	1	-5.84808	0.0704953	-4.33918	0.81289	-5.22194	0.151015
SEZ6L	0.0410436	1	-6.81507	0.039257	1.03534	1	-2.89226	0.74124	-1.26564	1	-0.904053	1
SMPD3	-2.81634	1	-3.76331	0.840052	-1.36018	1	-7.26899	0.0305199	-2.28343	1	-2.91718	1
RARRES2	0.833269	1	-0.846222	1	-1.29714	1	-7.87521	0.00398139	-3.61057	0.81289	-0.316667	1
PRUNE2	-0.984629	1	-3.63676	0.567181	-0.35108	1	-6.10794	0.00948866	-2.72984	1	-2.84118	1
ECM2	-0.336869	1	-2.39209	1	-0.443004	1	-4.79188	0.057848	-1.20373	1	-0.147312	1
PTGDS	-0.565516	1	-3.86225	0.57859	1.88039	1	-Inf	0.00232681	-4.97817	0.220039	-0.00193599	1
ATRNL1	-4.20991	1	-3.35035	1	-1.96891	1	-4.97062	0.225562	-9.18907	0.0144528	-4.88208	0.329351
SOD3	-3.29664	1	-2.99256	1	0.498128	1	-5.79567	0.0224605	-1.35562	1	-1.11049	1
CPZ	-0.732859	1	-2.74145	1	2.30629	1	-Inf	0.0224605	-1.01061	1	-1.71963	1
NRXN2	-1.44823	1	-4.96826	0.315973	-1.26674	1	-5.67369	0.0775432	-4.7501	0.249862	-3.39856	1
FAM65B	-0.870352	1	-3.74545	0.648412	0.294471	1	-5.7886	0.0300485	-1.47949	1	-0.440119	1
ENPP5	-0.687301	1	-2.10533	1	0.665326	1	-8.32712	0.00948793	-4.83816	0.305186	-3.22287	0.903754
RBP1	-3.0085	1	-Inf	0.0092325	-1.39729	1	-1.16117	1	-5.5821	0.543132	-6.97479	0.149195
DNAJC6	-1.00129	1	-1.5217	1	-1.05054	1	-5.73866	0.0230695	-4.13627	0.454485	-0.147409	1
ABCG2	-2.52903	1	-5.52572	0.111612	-3.2311	1	-6.59781	0.0477542	-5.72535	0.305186	-4.19529	1
PPP4R4	-3.96563	1	-2.94366	1	-2.33487	1	-6.33844	0.0327642	-5.22373	0.170308	-6.49399	0.142266
DUSP4	-2.11492	1	-4.59574	0.333636	-2.33899	1	-5.05099	0.0942929	-3.85771	0.615215	-3.67313	1
FMOD	-1.4196	1	-3.00964	1	0.240123	1	-6.68225	0.00398139	-0.987961	1	-0.810529	1
COL10A1	-1.18241	1	-5.03445	0.219648	-4.75858	1	-6.90679	0.0093249	-4.1037	0.532215	-4.11982	1
NRK	-3.82445	1	-5.28993	0.0428969	-1.01753	1	-5.01973	0.11276	0.453919	1	1.77475	1
PAX8	-2.37262	1	-3.16478	0.96544	-2.12416	1	-4.58233	0.160587	-6.93094	0.0199888	-3.37381	1
MASP1	-2.07668	1	-3.06313	1	-0.364363	1	-6.11049	0.0120145	-3.48772	0.702249	-1.2102	1
TNFRSF19	0.0663498	1	-1.23351	1	-1.05894	1	-1.79501	1	-5.28788	0.0689516	-2.30481	1
GNAZ	-3.53392	1	-3.77917	0.760363	-2.60874	1	-4.60335	0.272187	-6.36802	0.0646421	-4.46344	0.499387
PDE11A	-2.59076	1	-4.75851	0.239777	-2.08828	1	-7.93014	0.0298043	0.948547	1	-4.91632	0.724367
PNPLA7	-0.865798	1	-3.01192	1	-0.115152	1	-7.17679	0.0663565	-0.147011	1	-0.478766	1
PTPRE	-2.24645	1	-3.42193	1	-2.28845	1	-5.87313	0.0594452	-4.42808	0.532215	-4.27207	1
CHI3L1	0.454787	1	-1.06808	1	-0.162287	1	-Inf	0.0906352	-2.84908	1	0.599322	1
TMTC1	-4.34668	1	-3.72827	0.628741	-0.153986	1	-6.71284	0.00411446	-2.41465	1	-0.637271	1
TEC	-0.669576	1	-2.55638	1	-0.481221	1	-Inf	0.0883987	-5.9504	0.584341	-2.65313	1
SYTL2	-0.559016	1	-3.8577	0.466448	-0.311598	1	-5.58229	0.0293703	-3.41682	0.908015	-3.82461	0.387911
SLC40A1	-0.897062	1	-2.58617	1	1.09763	1	-6.64429	0.0119479	-1.59746	1	-1.61963	1
PRICKLE1	-1.22802	1	-2.89394	1	-1.40874	1	-7.2196	0.00739361	-0.945046	1	-0.367396	1
RBP5	-0.0257223	1	-4.74928	0.201421	0.0968287	1	-6.89854	0.0272136	0.672906	1	-1.69523	1
N4BP2L1	-1.31155	1	-2.34922	1	-1.36571	1	-5.55308	0.0455688	-1.44878	1	-2.06023	1
GREB1L	-0.0506477	1	-4.7579	0.218606	-0.128268	1	-5.64258	0.0336935	-5.03204	0.16127	-2.00039	1
GRIP2	-4.91079	1	-2.23886	1	-1.76475	1	-5.8183	0.0637748	-3.99033	0.913688	-1.94299	1
SFRP2	-0.279815	1	-3.11539	1	-1.69726	1	-6.33305	0.0093249	-2.76275	1	-2.00813	1
NTRK2	-2.92326	1	-4.36351	0.315659	2.0047	1	-5.96607	0.0310603	-1.94846	1	1.91443	1
FAM13C	-2.45933	1	-Inf	0.00728857	-0.831426	1	-4.93004	0.259343	-0.829765	1	-5.17314	0.408609
NCAM1	-2.23216	1	-3.49252	0.765784	-3.88619	1	-3.57035	0.478621	-3.34182	1	-6.36771	0.065264
MPP7	-4.02959	1	-5.77379	0.124103	-3.28067	1	-4.78374	0.135683	-4.93396	0.468878	-6.30062	0.0648514
ADRA2A	-2.40913	1	-2.13748	1	-0.537201	1	-6.31263	0.00798649	-1.89135	1	-0.58806	1
RNF144A	-1.27117	1	-1.26815	1	0.80259	1	-4.77109	0.140624	-5.40264	0.0646421	-1.60274	1
PARP8	0.488709	1	-0.859634	1	-0.0688335	1	-5.01868	0.123943	-6.9511	0.0286169	-4.62112	0.254075
SPON1	-2.03775	1	-3.87811	0.553201	-1.28111	1	-6.87247	0.00289245	-3.03115	1	-1.21407	1
IGSF10	-3.03927	1	-1.98952	1	0.828294	1	-6.2063	0.00959951	-2.50111	1	-1.116	1
GJA1	0.147932	1	-2.78003	1	-2.20497	1	-5.78042	0.0166266	-2.79762	1	-1.62637	1
SLC25A27	-0.742785	1	-2.76862	1	-0.355433	1	-5.96019	0.0226327	-1.6456	1	-2.45144	1
ANKFN1	-2.84396	1	-Inf	0.0211514	0.454747	1	-4.12628	0.574099	-4.28367	0.748224	-0.770081	1
ABCA9	-0.29822	1	-2.3989	1	1.51912	1	-5.05329	0.0447815	1.26931	1	0.152837	1
JAM2	-3.00748	1	-5.2137	0.166938	-2.65635	1	-8.07686	0.000748392	-4.59144	0.397909	-5.23673	0.171272
ADAMTS5	0.608012	1	-0.635628	1	0.49367	1	-4.56386	0.095369	-2.00577	1	0.824815	1
PIEZO2	-1.70963	1	-4.58839	0.315973	-2.9202	1	-7.92274	0.00167374	-3.63666	1	-4.82693	0.13085
DKK2	0.177347	1	-3.43986	0.808947	-0.0526022	1	-9.15663	0.000141401	-4.86731	0.297834	-1.14937	1
KCNJ6	-2.09519	1	-2.96042	1	-0.337411	1	-6.54472	0.0177592	-5.19721	0.122426	-3.1463	1
ACAN	-2.51536	1	-0.0825491	1	1.71619	1	-Inf	0.00240011	0.21146	1	0.728687	1
GALNT14	-1.20535	1	-2.03337	1	-1.20348	1	-4.37701	0.224108	-9.23047	0.00251157	-0.405798	1
PLXDC1	-4.23644	1	-4.94881	0.215186	1.69241	1	-5.77222	0.0389168	-4.86993	0.156875	-3.12421	1
SPRY1	-2.08084	1	-3.65968	0.865139	0.175196	1	-6.40971	0.0141641	-2.38304	1	-1.91206	1
FAM198B	-0.389801	1	-1.28997	1	-0.469657	1	-4.71417	0.0482939	-0.696133	1	0.736908	1
ANKRD33B	-2.8446	1	-3.31077	1	0.284899	1	-7.65345	0.0334295	-0.814802	1	-2.17559	1
ZNF704	-3.41575	1	-3.95394	0.50638	-0.580755	1	-6.87189	0.00824499	-4.05467	0.641528	-1.25745	1
PLEKHA7	-0.190376	1	-2.36573	1	-0.61351	1	-8.12804	0.0166266	-1.98341	1	-1.20398	1
COL4A3	-5.52652	0.899241	-6.16284	0.0665384	-1.04309	1	-4.39432	0.350988	-5.3701	0.329464	-4.35142	0.300036
PDGFD	-2.22515	1	-2.57284	1	-0.0778091	1	-4.9536	0.0316183	-2.35252	1	0.405191	1
SYNPO2	-1.01427	1	-4.77351	0.195905	-2.3913	1	-7.24331	0.00230551	-4.11622	0.619767	-3.36448	0.657745
SULT1B1	-3.87504	1	-2.48162	1	-0.0935267	1	-Inf	0.0308268	-2.37319	1	0.795188	1
DIRC1	-1.51818	1	-2.8461	1	1.95089	1	-Inf	0.0310106	-2.84509	1	-4.90791	0.222193
KCNA3	-5.36411	1	-3.02545	1	-2.66678	1	-Inf	0.0637748	-6.91579	0.182416	-1.33704	1
MAF	-2.02571	1	-3.2671	0.79902	-0.45647	1	-5.26701	0.0412453	-5.47721	0.126623	-2.73585	1
CHST15	-2.85845	1	-3.87544	0.473996	-0.287231	1	-6.78523	0.00739361	-4.5398	0.329464	-3.96094	0.669357
KCNA4	0.0949451	1	-2.14347	1	-1.61914	1	-7.61393	0.00561383	-3.85334	0.764408	-2.46884	1
FOXL2	-1.15591	1	-1.544	1	-0.0666091	1	-4.78678	0.134956	-7.09318	0.016125	-1.45679	1
TACSTD2	-1.31389	1	-3.42641	1	-1.0716	1	-5.42127	0.0906352	-4.99061	0.489026	-4.62713	0.574761
ROBO2	-3.3633	1	-4.7575	0.268941	-1.30312	1	-9.20512	0.00027967	-3.14939	1	-1.11187	1
CYP27C1	-2.62396	1	-3.08888	1	-2.42039	1	-5.57718	0.0968693	-2.55512	1	-1.94115	1
LYPD6	-1.23617	1	-3.4794	0.808947	-1.29468	1	-5.65673	0.0455688	-3.7876	1	-1.68817	1
COL4A5	-4.65483	1	-3.72777	0.663904	-0.862863	1	-5.09579	0.0637748	-5.94016	0.105766	-4.24929	0.631511
PAX8-AS1	-1.82206	1	-2.31959	1	-1.10519	1	-3.39568	0.592005	-6.82354	0.0207836	-2.11186	1
GPX1P1	-0.524896	1	-0.947396	1	-0.0211737	1	-0.676589	1	-0.537711	1	-9.87845	0.00584518
MBP	-1.48045	1	-2.90947	1	0.0506976	1	-5.17546	0.0954613	-0.722339	1	-1.90941	1
SLC5A3	-2.45998	1	-4.26159	0.239777	-1.07017	1	-4.74355	0.0628332	-2.79422	1	-1.13044	1
PLXNB3	-2.83037	1	-4.46532	0.185377	-1.25617	1	-6.8209	0.00443059	-2.9197	1	-4.41672	0.700001
EGFL6	0.316669	1	-2.51728	1	0.445593	1	-9.06212	0.000474039	-5.00599	0.182416	-0.883686	1
SERTAD4-AS1	-0.842827	1	-2.28065	1	-2.57167	1	-5.41722	0.0663565	-2.44068	1	-2.0836	1
COL15A1	-0.713701	1	-1.47225	1	0.694245	1	-4.99631	0.0564582	-1.79457	1	0.471914	1
GPX3	-3.54374	1	-3.65979	0.721555	-0.629607	1	-5.66711	0.0421543	-4.17775	0.532215	-3.16677	1
DIO2	-3.75089	1	-4.4881	0.232646	-2.82016	1	-6.6587	0.00705509	-4.50122	0.478902	-2.34746	1
ASIC3	-0.321953	1	-Inf	0.0848323	-0.519525	1	-2.99337	0.943065	-1.52308	1	-3.04221	1
UBE2QL1	-2.22641	1	-5.58697	0.315973	-2.96102	1	-Inf	0.0789629	-5.27932	0.700137	-6.71438	0.425963
OR1H1P	0.411296	1	-3.58054	1	0.831458	1	-Inf	0.0774416	-1.17838	1	-3.74184	1
AC018470.4	-1.44085	1	-Inf	0.00885538	1.63964	1	-3.81081	0.324778	-4.52635	0.454485	-0.974104	1
LINC00472	-1.12667	1	-3.75185	0.463289	-0.935088	1	-5.70755	0.0637748	-1.58918	1	-1.47778	1
GAS6-AS1	-2.38435	1	-2.79351	1	-2.31472	1	-6.80366	0.0759545	-3.0116	1	-4.36748	1
AL161626.1	-0.524805	1	-7.01613	0.0255545	0.878824	1	-5.07771	0.132714	0.840036	1	-0.805455	1
PSG2	-0.639137	1	-1.97906	1	1.28392	1	-6.88467	0.0218598	-4.43724	0.263613	-0.140474	1
MBL1P	-2.38036	1	-Inf	0.0181594	-0.27292	1	-3.33008	0.772295	-1.60926	1	-3.41178	1
LINC00968	-1.69693	1	-2.25171	1	-1.99808	1	-4.70594	0.0661045	-3.20153	1	-0.625541	1
CTD-2201I18.1	-0.982724	1	-3.19119	0.660942	-1.13438	1	-5.97002	0.0421741	-5.7676	0.170978	-2.12054	1
RP11-834C11.7	-0.205024	1	-4.26489	0.449692	-0.0810272	1	-4.26659	0.612489	-4.82579	0.454485	-Inf	0.0699059
LYN	-3.5131	1	-2.42535	1	-1.05447	1	-6.77044	0.0377898	-5.93282	0.102731	-2.7031	1
RP11-17A4.2	-1.80587	1	-2.77132	1	-2.37824	1	-6.84269	0.0560726	-3.1133	1	-0.683048	1
RP11-94A24.1	-1.27204	1	-4.52641	0.208086	-1.34917	1	-Inf	0.00739361	-2.14384	1	-2.0398	1
RP11-66N24.3	-0.208373	1	-Inf	0.0128346	-0.220752	1	-3.17554	0.80223	0.0241035	1	-2.64429	1
GS1-358P8.4	-1.72848	1	-Inf	0.0651466	-4.24449	1	-5.59259	0.183476	-5.03699	0.551172	-3.02389	1
RP11-824M15.3	-2.54643	1	-3.4229	0.837146	0.200857	1	-4.49514	0.195039	-5.68272	0.0667498	-3.81978	0.604395

## Sheet: Up genes GO
Category	Term	Count	%	PValue	Genes	List Total	Pop Hits	Pop Total	Fold Enrichment	Bonferroni	Benjamini	FDR
GOTERM_MF_FAT	GO:0008009~chemokine activity	6	0.798935	1.49029e-06	CCL11, CXCL1, IL8, CXCL5, CXCL3, CXCL6	57	46	12983	29.7094	0.000274175	0.000274175	0.00184238
GOTERM_MF_FAT	GO:0005125~cytokine activity	9	1.1984	1.71919e-06	CCL11, CXCL1, IL8, CXCL5, CXCL3, IL1B, GDF10, CXCL6, IL33	57	195	12983	10.5126	0.00031628	0.000158153	0.00212535
GOTERM_MF_FAT	GO:0042379~chemokine receptor binding	6	0.798935	2.05289e-06	CCL11, CXCL1, IL8, CXCL5, CXCL3, CXCL6	57	49	12983	27.8904	0.000377661	0.000125903	0.0025379
GOTERM_BP_FAT	GO:0007626~locomotory behavior	10	1.33156	5.22882e-06	CCL11, CXCL1, IL8, CXCL5, CXCL3, APBA2, IL1B, RELN, CXCL6, TRH	65	274	13528	7.59573	0.00464285	0.00464285	0.00813832
GOTERM_BP_FAT	GO:0006955~immune response	14	1.86418	1.66435e-05	CXCL1, EXO1, BST2, IL8, CXCL5, PRG4, CXCL3, RSAD2, IFI44L, CXCL6, CCL11, OASL, IL1B, IFI6	65	690	13528	4.22279	0.0147037	0.00737905	0.0259024
GOTERM_CC_FAT	GO:0005615~extracellular space	14	1.86418	3.3231e-05	CXCL1, IL8, CXCL5, CXCL3, IL33, CXCL6, CCL11, MMP10, THBD, ISG15, GDF10, IL1B, FGL2, RELN	66	685	12782	3.95815	0.00404605	0.00404605	0.0382544
GOTERM_BP_FAT	GO:0007610~behavior	11	1.46471	6.431e-05	CCL11, CXCL1, IL8, CXCL5, CXCL3, APBA2, IL1B, RELN, CXCL6, TRH, GAL	65	469	13528	4.88135	0.0556305	0.0188984	0.100051
GOTERM_BP_FAT	GO:0051301~cell division	9	1.1984	7.13185e-05	SPC24, PARD6B, SKA3, BIRC5, CDC20, SKA1, AURKB, PTTG1, UBE2C	65	295	13528	6.34952	0.0615031	0.0157437	0.110949
GOTERM_CC_FAT	GO:0044421~extracellular region part	16	2.13049	7.18423e-05	CXCL1, IL8, CXCL5, CXCL3, CXCL6, IL33, MMP12, CCL11, MMP10, THBD, ISG15, GDF10, IL1B, FGL2, RELN, COL8A1	66	960	12782	3.22778	0.00872678	0.00437295	0.0826856
GOTERM_BP_FAT	GO:0000280~nuclear division	8	1.06525	7.73391e-05	SPC24, SKA3, BIRC5, CDC20, SKA1, AURKB, PTTG1, UBE2C	65	220	13528	7.56811	0.0665188	0.0136726	0.12031
GOTERM_BP_FAT	GO:0007067~mitosis	8	1.06525	7.73391e-05	SPC24, SKA3, BIRC5, CDC20, SKA1, AURKB, PTTG1, UBE2C	65	220	13528	7.56811	0.0665188	0.0136726	0.12031
GOTERM_CC_FAT	GO:0005576~extracellular region	24	3.19574	7.99442e-05	CXCL1, CXCL5, IL8, CGB5, PRG4, CXCL3, CXCL6, IL33, TRH, GAL, MMP12, CCL11, MMP10, THBD, ISG15, PSG4, GDF10, IL1B, RELN, FCRLA, FGL2, HHIP, PI16, COL8A1	66	2010	12782	2.31244	0.00970617	0.00324591	0.0920064
GOTERM_BP_FAT	GO:0000087~M phase of mitotic cell cycle	8	1.06525	8.65984e-05	SPC24, SKA3, BIRC5, CDC20, SKA1, AURKB, PTTG1, UBE2C	65	224	13528	7.43297	0.0741804	0.0127638	0.134705
GOTERM_BP_FAT	GO:0048285~organelle fission	8	1.06525	9.94264e-05	SPC24, SKA3, BIRC5, CDC20, SKA1, AURKB, PTTG1, UBE2C	65	229	13528	7.27068	0.0846913	0.0125624	0.154645
GOTERM_BP_FAT	GO:0006935~chemotaxis	7	0.932091	0.000106042	CCL11, CXCL1, IL8, CXCL5, CXCL3, IL1B, CXCL6	65	160	13528	9.10538	0.0900653	0.0117285	0.164927
GOTERM_BP_FAT	GO:0042330~taxis	7	0.932091	0.000106042	CCL11, CXCL1, IL8, CXCL5, CXCL3, IL1B, CXCL6	65	160	13528	9.10538	0.0900653	0.0117285	0.164927
GOTERM_BP_FAT	GO:0000279~M phase	9	1.1984	0.000151991	SPC24, EXO1, SKA3, BIRC5, CDC20, SKA1, AURKB, PTTG1, UBE2C	65	329	13528	5.69334	0.126531	0.014919	0.236312
GOTERM_CC_FAT	GO:0000779~condensed chromosome, centromeric region	5	0.665779	0.000346481	SPC24, CENPM, SKA3, SKA1, AURKB	66	66	12782	14.6717	0.0413968	0.0105138	0.398201
GOTERM_CC_FAT	GO:0000775~chromosome, centromeric region	6	0.798935	0.000411086	SPC24, CENPM, SKA3, BIRC5, SKA1, AURKB	66	124	12782	9.37097	0.0489254	0.0099824	0.472289

## Sheet: Down genes GO
Category	Term	Count	%	PValue	Genes	List Total	Pop Hits	Pop Total	Fold Enrichment	Bonferroni	Benjamini	FDR
GOTERM_CC_FAT	GO:0031012~extracellular matrix	19	10.5556	6.16301e-08	COL4A4, FMOD, COL4A3, EGFL6, COL15A1, CHI3L1, ECM2, VIT, NTN1, SOD3, PRELP, COL4A5, CPZ, SMOC2, ACAN, ADAMTS5, SPON1, COL10A1, THBS4	145	345	12782	4.85473	1.23259e-05	1.23259e-05	7.72469e-05
GOTERM_CC_FAT	GO:0005578~proteinaceous extracellular matrix	18	10	1.13841e-07	COL4A4, FMOD, COL4A3, EGFL6, COL15A1, CHI3L1, ECM2, VIT, NTN1, PRELP, COL4A5, CPZ, SMOC2, ACAN, ADAMTS5, SPON1, COL10A1, THBS4	145	320	12782	4.95853	2.27679e-05	1.1384e-05	0.000142688
GOTERM_CC_FAT	GO:0005576~extracellular region	47	26.1111	8.51347e-07	FGFR2, ENPP5, FMOD, A2M, RARRES2, LYPD6, EPDR1, MASP1, VIT, CPZ, IGSF10, RSPO4, SMOC2, NPTX2, SERPINA5, GPX3, ACAN, ITIH5, LOXL4, PDGFD, SEPP1, PRSS35, MYOC, COL10A1, SPON1, THBS4, COL4A4, COL4A3, CLCA2, EGFL6, PSG2, COL15A1, CHI3L1, ECM2, NTN1, SOD3, PRELP, COL4A5, INHBB, NCAM1, DKK2, PTGDS, SFRP2, PLXDC1, SFRP4, IGFBP2, ADAMTS5	145	2010	12782	2.06126	0.000170255	5.67549e-05	0.00106707
GOTERM_MF_FAT	GO:0030246~carbohydrate binding	15	8.33333	5.24739e-06	FGFR2, ATRNL1, CHI3L1, ECM2, SOD3, PRELP, RSPO4, CLEC12A, NPTX2, SERPINA5, CLEC2A, CLEC12B, ACAN, CLEC1B, GALNT14, THBS4	122	354	12983	4.50924	0.00171967	0.00171967	0.00710722
GOTERM_CC_FAT	GO:0044421~extracellular region part	28	15.5556	7.88526e-06	FMOD, A2M, MASP1, VIT, CPZ, SMOC2, GPX3, ACAN, LOXL4, SEPP1, MYOC, THBS4, COL10A1, SPON1, COL4A4, COL4A3, EGFL6, CHI3L1, COL15A1, ECM2, NTN1, SOD3, PRELP, COL4A5, DKK2, SFRP4, IGFBP2, ADAMTS5	145	960	12782	2.57109	0.00157581	0.000394187	0.00988291
GOTERM_BP_FAT	GO:0007155~cell adhesion	20	11.1111	2.46995e-05	COL4A3, CLCA2, CLSTN2, EPDR1, NRXN2, EGFL6, SDK2, SDK1, COL15A1, ECM2, NCAM1, ITGA8, NLGN4X, ACAN, CNTN1, ROBO2, EMB, JAM2, THBS4, SPON1	127	700	13528	3.04342	0.0267559	0.0267559	0.039482
GOTERM_BP_FAT	GO:0022610~biological adhesion	20	11.1111	2.51906e-05	COL4A3, CLCA2, CLSTN2, EPDR1, NRXN2, EGFL6, SDK2, SDK1, COL15A1, ECM2, NCAM1, ITGA8, NLGN4X, ACAN, CNTN1, ROBO2, EMB, JAM2, THBS4, SPON1	127	701	13528	3.03908	0.0272806	0.0137346	0.0402669
GOTERM_CC_FAT	GO:0005604~basement membrane	8	4.44444	2.69685e-05	COL4A4, SMOC2, COL4A3, EGFL6, ACAN, COL15A1, NTN1, COL4A5	145	78	12782	9.0412	0.00537925	0.00107817	0.033797
GOTERM_CC_FAT	GO:0044420~extracellular matrix part	9	5	5.1775e-05	COL4A4, SMOC2, COL4A3, EGFL6, ACAN, COL15A1, NTN1, COL4A5, COL10A1	145	117	12782	6.7809	0.0103018	0.00172439	0.0648753
GOTERM_MF_FAT	GO:0005201~extracellular matrix structural constituent	7	3.88889	0.000148137	COL4A4, COL4A3, CHI3L1, ACAN, COL15A1, PRELP, COL4A5	122	86	12983	8.66193	0.0474307	0.0240034	0.200461
GOTERM_MF_FAT	GO:0005539~glycosaminoglycan binding	8	4.44444	0.000331318	FGFR2, RSPO4, SERPINA5, ACAN, ECM2, SOD3, PRELP, THBS4	122	140	12983	6.08103	0.102992	0.0355817	0.447831
GOTERM_MF_FAT	GO:0008201~heparin binding	7	3.88889	0.000396219	FGFR2, RSPO4, SERPINA5, ECM2, SOD3, PRELP, THBS4	122	103	12983	7.23229	0.121892	0.031974	0.535336
GOTERM_BP_FAT	GO:0010817~regulation of hormone levels	8	4.44444	0.000523563	RBP1, DIO2, LYN, SLCO4A1, SULT1B1, CYP26B1, SRD5A2, SMPD3	127	151	13528	5.64343	0.437308	0.174424	0.833793
GOTERM_MF_FAT	GO:0030247~polysaccharide binding	8	4.44444	0.000588348	FGFR2, RSPO4, SERPINA5, ACAN, ECM2, SOD3, PRELP, THBS4	122	154	12983	5.52821	0.175547	0.0378712	0.793967
GOTERM_MF_FAT	GO:0001871~pattern binding	8	4.44444	0.000588348	FGFR2, RSPO4, SERPINA5, ACAN, ECM2, SOD3, PRELP, THBS4	122	154	12983	5.52821	0.175547	0.0378712	0.793967
GOTERM_CC_FAT	GO:0005581~collagen	5	2.77778	0.000616658	COL4A4, COL4A3, COL15A1, COL4A5, COL10A1	145	35	12782	12.5931	0.116063	0.0174698	0.770175
