# Supplementary material for: Genome-wide DNA hypomethylation and RNA:DNA hybrid accumulation in Aicardi–Goutières syndrome
Source: eLife. 2015 Jul 16;4:e08007. doi: 10.7554/eLife.08007 (PMC4528086; doi:10.7554/eLife.08007)
Supplement: Supplementary file 3. — Primer sequences for real-time reverse-transcription PCR and bisulfite sequencing. DOI: http://dx.doi.org/10.7554/eLife.08007.016 [file elife08007s003.xlsx]

## Sheet: Sheet1
Supplementary File 3
Locus	Primer sequence
GAPDH L	TCCACTGGCGTCTTCACC
GAPDH R	GGCAGAGATGATGACCCTTTT
SDHA L	GGAAGCATAAGAACATCGGAACTG
SDHA R	CTGATTTTCCCACAACCTTCTTGC
OASL L	CGGGTGCTGAAGGTAGTCAA
OASL R	AAACAGCTCAGAAACGCCAC
BST2 L	AGAAGGGCTTTCAGGATGTG
BST2 R	CTTTTGTCCTTGGGCCTTCT
CXCL5 L	TTGTCTTGATCCAGAAGCCC
CXCL5 R	AAACTTTTCCATGCGTGCTC
IL1B L	GAAGCTGATGGCCCTAAACA
IL1B R	AAGCCCTTGCTGTAGTGGTG
IGF2BP1 L	AGGCCATCGAAACTTTCTCC
IGF2BP1 R	TTTCGGATTTGAATTTTCCG
