# Supplementary material for: Genome-wide DNA hypomethylation and RNA:DNA hybrid accumulation in Aicardi–Goutières syndrome
Source: eLife. 2015 Jul 16;4:e08007. doi: 10.7554/eLife.08007 (PMC4528086; doi:10.7554/eLife.08007)
Supplement: Supplementary file 4. — Pearson's correlation between each pair of RNA-seq biological replicates. DOI: http://dx.doi.org/10.7554/eLife.08007.017 [file elife08007s004.xlsx]

## Sheet: Sheet1
Supplementary File 4
	Pearson's correlation between 2 biological replicates
control 1	0.984619
AGS1_P1	0.960722
AGS2_P1	0.93693
AGS2_P2	0.987926
AGS4_P1	0.924522
AGS4_P2	0.988046
AGS5_P1	0.966371
