# Supplementary figures and images for: Genome-wide DNA hypomethylation and RNA:DNA hybrid accumulation in Aicardi–Goutières syndrome
Source: eLife journal article supplement (doi:10.7554/elife.08007), 2015-07-16

Figure 3 - figure supplement 1

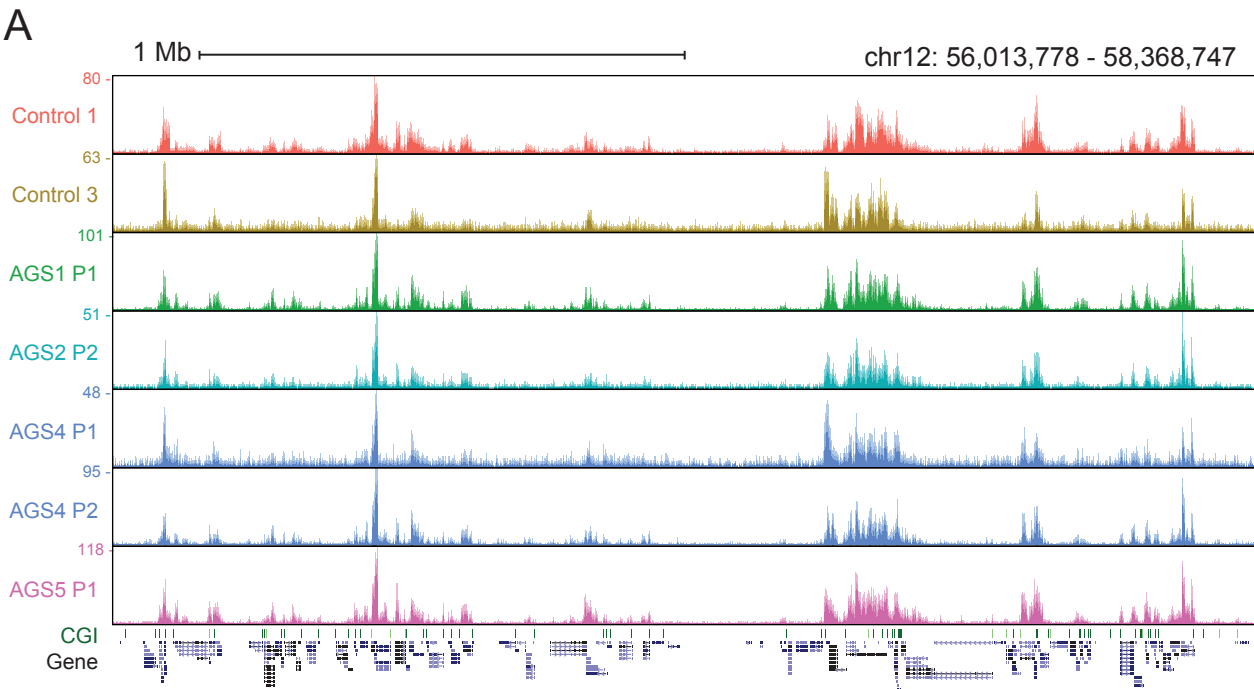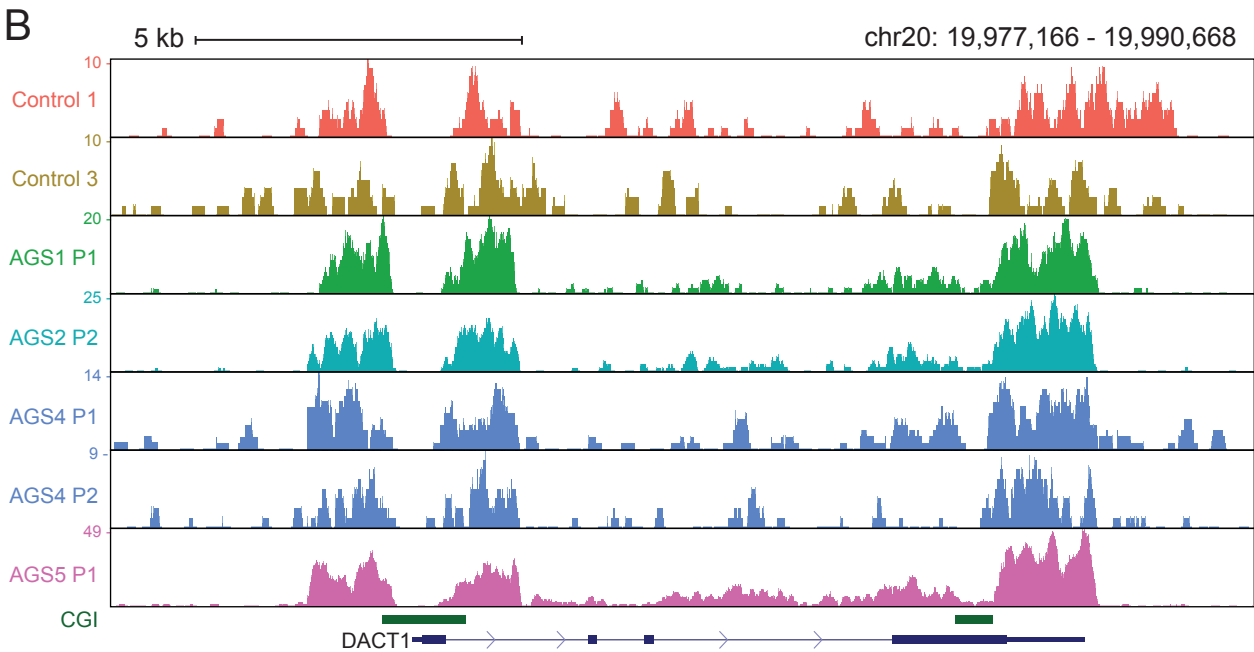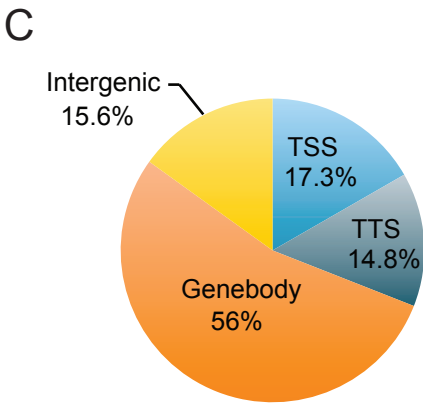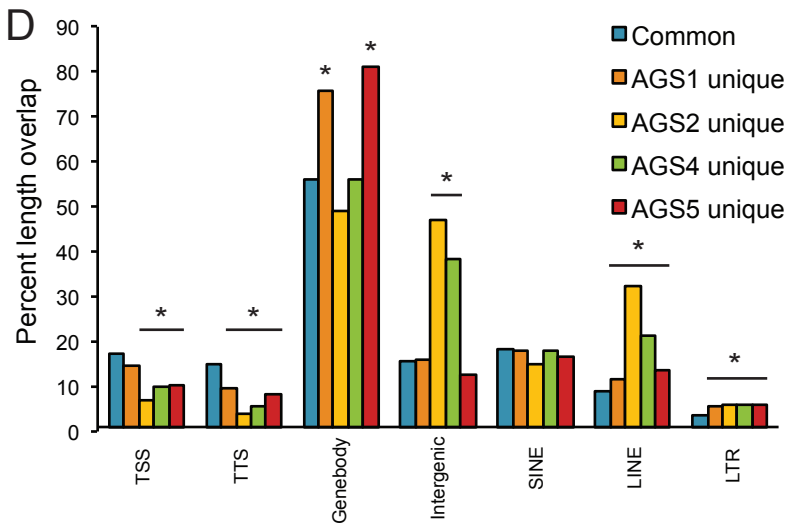

Supplement: supp [file elife-08007-supp-v1.zip]

Figure 5 - figure supplement 1

A

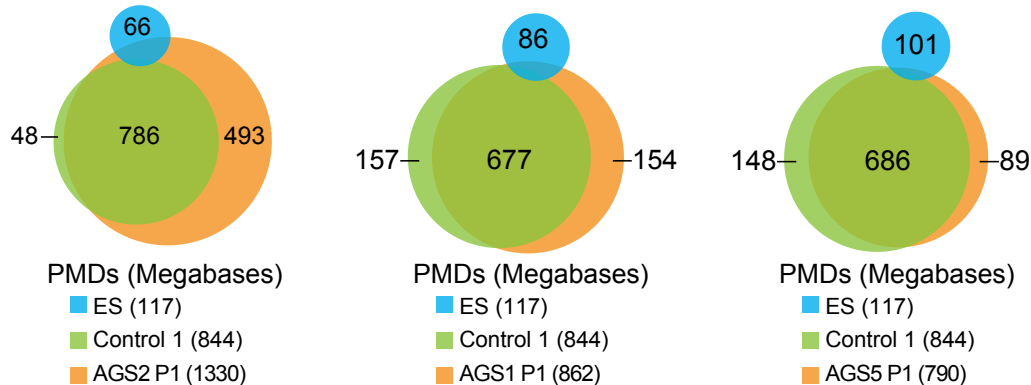

B

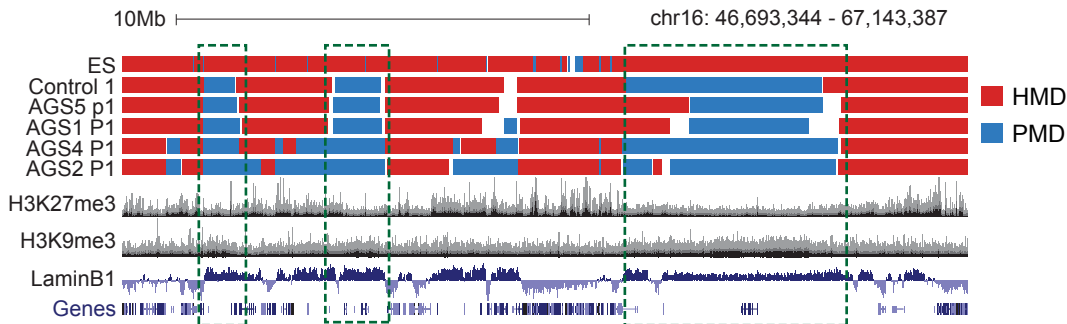

Supplement: supp [file elife-08007-supp-v1.zip]

Figure 1 - figure supplement 1

A

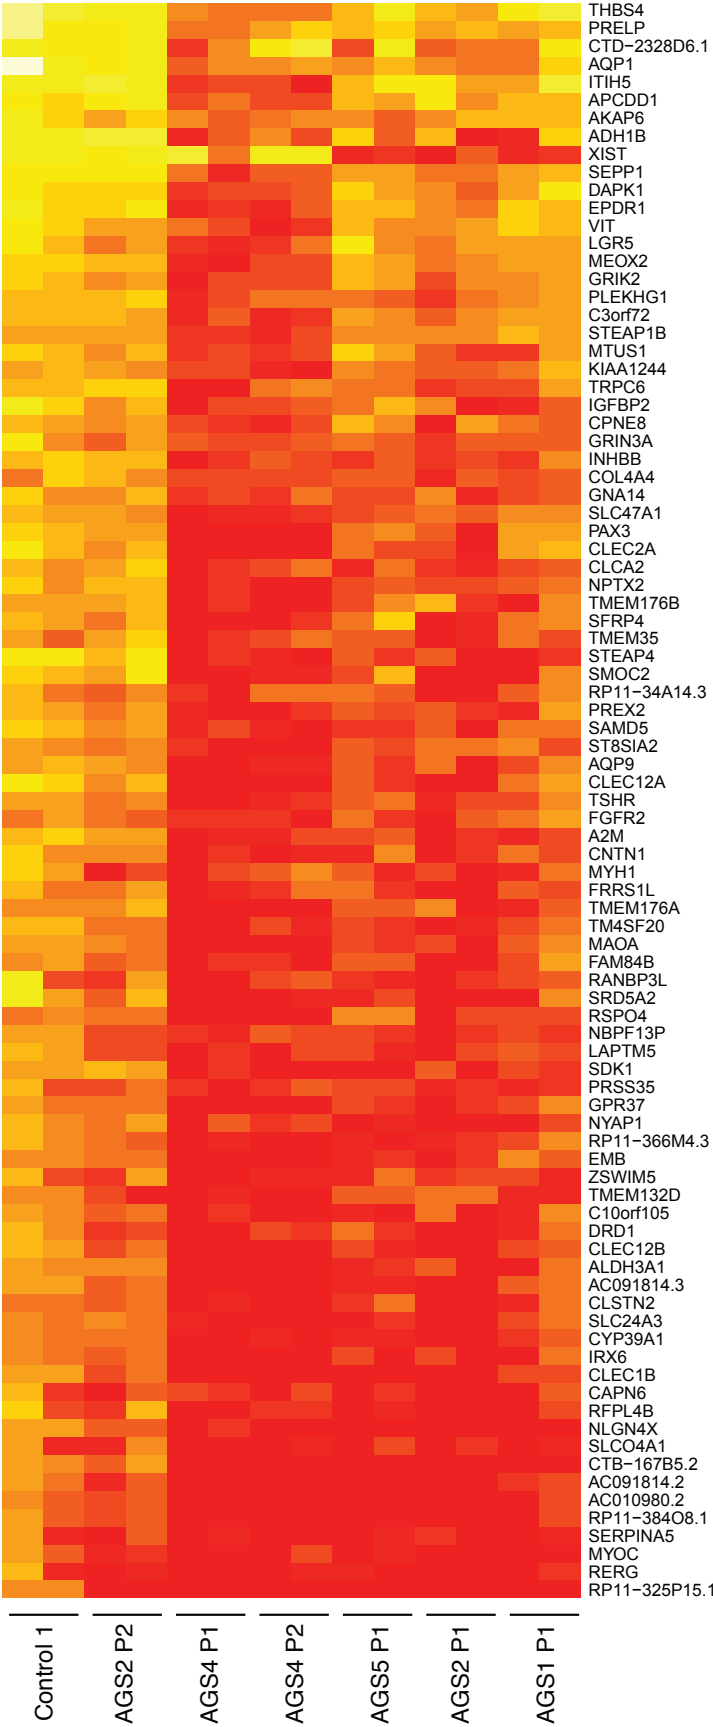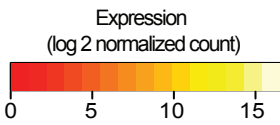

B

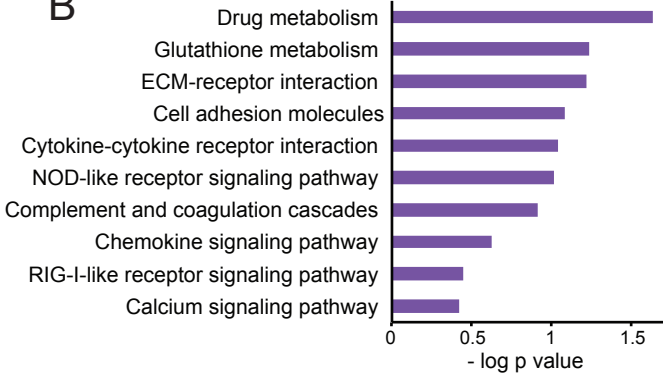

Supplement: supp [file elife-08007-supp-v1.zip]

Figure 4 - figure supplement 1

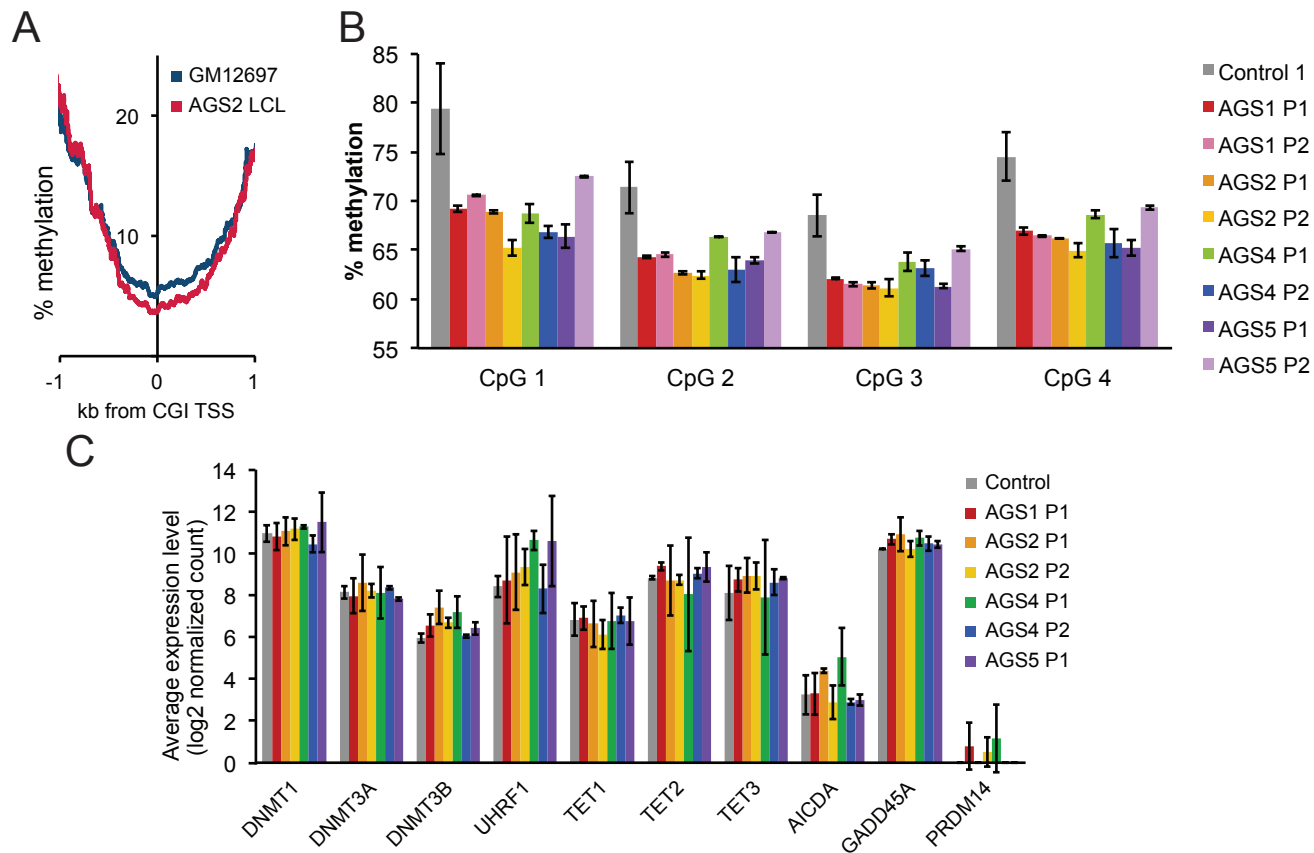

Supplement: supp [file elife-08007-supp-v1.zip]
